# Supplementary material for: Broad Cross-Reactive IgA and IgG against Human Coronaviruses in Milk Induced by COVID-19 Vaccination and Infection
Source: MDPI journal article supplement (doi:10.3390/vaccines10060980), 2022-06-20
Supplement: s1 [file s1]

# Supplementary Material

**Table S1. The demography of two cohorts in this study.**

|                                                  | Infection cohort          | Vaccinated Cohort             |
|--------------------------------------------------|---------------------------|-------------------------------|
| Total N                                          | 45                        | 30                            |
| Maternal Age (range)                             | 29.9 ± 4.4 (20-38)        | 33.0 ± 3.4 (25 – 42)          |
| Race (%)                                         |                           |                               |
| American Indian                                  | 1 (2.1%)                  | 0                             |
| Asian                                            | 0                         | 1 (3.3%)                      |
| Black                                            | 2 (4.2%)                  | 0                             |
| White                                            | 40 (85.1%)                | 29 (96.7%)                    |
| Other                                            | 2 (4.2%)                  | 0                             |
| More than One                                    | 1 (2.1%)                  | 0                             |
| Prefer not to Answer                             | 1 (2.1%)                  | 0                             |
| Ethnicity (%)                                    |                           |                               |
| Hispanic                                         | 12 (25.5%)                | 0                             |
| Non-Hispanic                                     | 24 (51.1%)                | 26 (86.7%)                    |
| Not reported                                     | 11 (23.4%)                | 4 (13.3%)                     |
| BMI (kg/m2) (range)                              | 28.8 ± 6.4 (20.2 – 45.2)  | 27.1 ± 6.8 (19.9 - 45.1)      |
| Parity                                           | 2.2 ± 1.1                 | 2.3 ± 1.3                     |
| Birth Weight (g) (range)                         | 3473 ± 439 (2735 - 4621)  | 3236 ± 540 (1644 - 4046)      |
| Infant sex                                       |                           |                               |
| Male                                             | 24 (51%)                  | 13 (43.3%)                    |
| Female                                           | 23 (49%)                  | 17 (56.7%)                    |
| Infant age (months) (range)                      | 3.1 ± 2.2 (0.2 – 9.0)     | 7.5 ± 5.2 (0.5 – 23.4)        |
| Breastfeeding Exclusivity at day0 or post dose 1 | 0.92 ± 0.18               | 0.96 ± 0.15                   |
| HM feeds (%)                                     | 36/46 (78%)               | 27/30 (90%)                   |
| Vaccine                                          |                           |                               |
| BNT162b2 (Pfizer-BioNTech)                       |                           | 12 (40%)                      |
| mRNA-1273 (Moderna)                              |                           | 18 (60%)                      |
| Household Member Diagnosed COVID-19              | 28/47 (59.6%)             | 5/30 (16.7%)                  |
| Infant Ever Tested                               | 17 (36%)                  | 13/30 (43%)                   |
| Infant Ever Diagnosed                            | 9 (53% tested, 19% total) | 2/13 (15% tested, 6.7% total) |

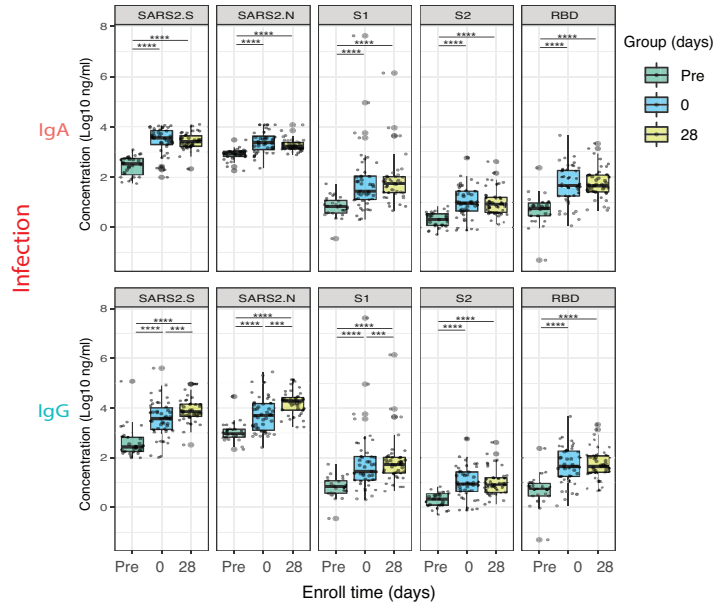

**Figure S1. Supplementary figure 1: Anti-SARS-CoV-2 IgG serum antibody response after SARS-CoV-2 infection.** In the infection cohort, the IgG antibodies in fingerstick blood samples had evaluated by mPLEX-CoV assay. All samples were tested at the same time in duplicate, and significant results were calculated with generalized linear mixed-effects models (\*\*\*\*  $P < 0.0001$ , \*\*\*  $P < 0.001$ , \*\*  $P < 0.01$ , \*  $P < 0.05$ ).

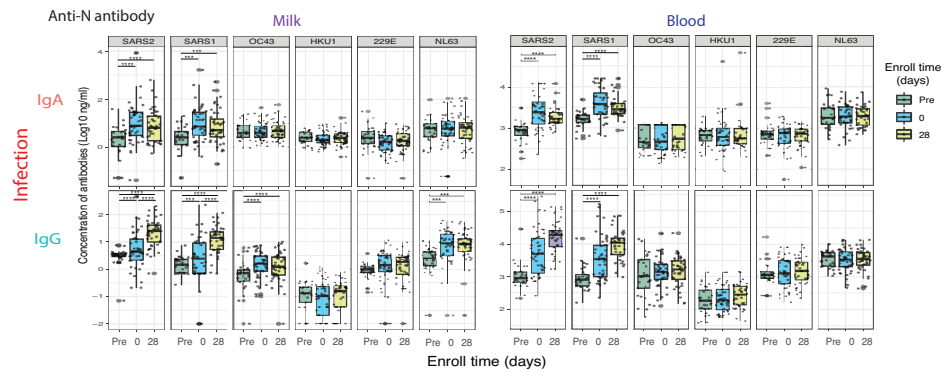

**Figure S2. Supplementary figure 2: Anti-N HCoV antibody response in human milk and blood after SARS-CoV-2 infection.** In the infection cohort, the anti-N IgG antibodies against SARS2, SARS1, and other common coronaviruses (HCoVs) in the milk and fingerstick blood samples had evaluated by mPLEX-CoV assay. All samples were tested at the same time in duplicate, and significant results were calculated with generalized linear mixed-effects models (\*\*\*\*  $P < 0.0001$ , \*\*\*  $P < 0.001$ , \*\*  $P < 0.01$ , \*  $P < 0.05$ ).

**Table S2. The mPlex-CoV assay panel of human coronaviruses.**

| Type     | Coronavirus | Protein | Abbreviation | textbfGene Acc |
|----------|-------------|---------|--------------|----------------|
| $\beta$  | SARS-CoV-2  | S       | SARS2        | EPI_ISL_402124 |
|          | SARS-CoV-1  | Protein | SARS1        | NC_004718.3    |
|          | HCoV-OC43   |         | OC43         | KX344031.1     |
|          | HCoV-HKU1   |         | HKU1         | AY597011       |
| $\alpha$ | HCoV-229E   |         | 229E         | KY369911.1     |
|          | HCoV-NL63   |         | NL63         | NC_005831.2    |
| $\beta$  | SARS-CoV-2  | N       | SARS2        | EPI_ISL_402124 |
|          | SARS-CoV-1  | Protein | SARS1        | NC_004718.3    |
|          | HCoV-OC43   |         | OC43         | KX344031.1     |
|          | HCoV-HKU1   |         | HKU1         | AY597011       |
| $\alpha$ | HCoV-229E   |         | 229E         | KY369911.1     |
|          | HCoV-NL63   |         | NL63         | NC_005831.2    |

<sup>a</sup> Spike (S) proteins of human coronaviruses are recombinant proteins expression by the baculovirus system with the trimerization domain at the C-terminal with His-tag.

<sup>b</sup> Nucleocapsid proteins of human coronaviruses are recombinant proteins with C-terminal His-tag .
